# Supplementary material for: Anticholinergic drug use and cognitive performances in middle age: findings from the CONSTANCES cohort
Source: PubMed Central journal article supplement — J Neurol Neurosurg Psychiatry. 2018 Sep 8;89(10):1107–15. doi: 10.1136/jnnp-2018-318190 (PMC6166611; doi:10.1136/jnnp-2018-318190), 2018-09-08
Supplement: jnnp-2018-318190supp001.pdf [file jnnp-2018-318190supp001.pdf]

## SUPPLEMENTARY MATERIEL

**e-Table 1: Distribution of anticholinergic drug classes by anticholinergic potency**

| <i>Anticholinergic drug class</i>     | <i>ATC classification level</i> | <i>Number of different ATC levels</i> | <i>ACB-1</i>    | <i>ACB-2/3</i>  |
|---------------------------------------|---------------------------------|---------------------------------------|-----------------|-----------------|
| Antihistamines                        | R06A                            | 10                                    | 7               | 3               |
| Opioids                               | N02A                            | 4                                     | 4               | 0               |
| Alimentary tract and metabolism drugs | A                               | 4                                     | 4               | 0               |
| Anxiolytic drugs                      | N05B                            | 4                                     | 3               | 1               |
| Antidepressant drugs                  | N06A                            | 9                                     | 2               | 7               |
| Cardiovascular system drugs           | C                               | 14                                    | 14              | 0               |
| Antipsychotic drugs                   | N05A                            | 11                                    | 4               | 7               |
| Other anticholinergic drugs           |                                 | 15                                    | 5               | 10              |
| <b><i>Total</i></b>                   |                                 | <b>71</b>                             | <b>43 (61%)</b> | <b>28 (39%)</b> |

ACB, Anticholinergic Cognitive Burden scale; ATC, Anatomical Therapeutic Chemical classification system.

e-Table 2: Relation between cumulative exposure to anticholinergic drugs over a 3-year period and z-scores on cognitive function tests according to age groups (n=34 267)

| Cumulative exposure to AC treatment |       | Episodic memory       |     |                       |     | Verbal fluency        |     |                       |    | Executive functions   |     |                       |     |                |     |
|-------------------------------------|-------|-----------------------|-----|-----------------------|-----|-----------------------|-----|-----------------------|----|-----------------------|-----|-----------------------|-----|----------------|-----|
|                                     |       | Free recall           |     | Delayed free recall   |     | Semantic fluency      |     | Phonemic fluency      |    | DSST                  |     | TMT-A                 |     | TMT-B          |     |
|                                     |       | Estimate (Std. Error) |     | Estimate (Std. Error) |     | Estimate (Std. Error) |     | Estimate (Std. Error) |    | Estimate (Std. Error) |     | Estimate (Std. Error) |     |                |     |
| <b>45 to 64 years (n=27010)</b>     |       |                       |     |                       |     |                       |     |                       |    |                       |     |                       |     |                |     |
| <b>No delivery</b>                  | 14289 | Ref                   |     | Ref                   |     | Ref                   |     | Ref                   |    | Ref                   |     | Ref                   |     | Ref            |     |
| <b>0_3 months</b>                   | 8347  | -0.008 (0.006)        |     | -0.015 (0.006)        | *   | -0.039 (0.006)        | *** | -0.003 (0.006)        |    | -0.012 (0.006)        | *   | 0.002 (0.006)         |     | -0.008 (0.006) |     |
| <b>3_12 months</b>                  | 2680  | -0.052 (0.009)        | *** | -0.048 (0.009)        | *** | -0.059 (0.010)        | *** | -0.007 (0.010)        |    | 0.000 (0.009)         |     | 0.007 (0.010)         |     | -0.015 (0.010) |     |
| <b>1_3 years</b>                    | 1282  | -0.016 (0.013)        |     | -0.032 (0.013)        | *   | -0.058 (0.013)        | *** | 0.016 (0.013)         |    | -0.037 (0.013)        | **  | -0.050 (0.013)        | *** | -0.014 (0.013) |     |
| <b>&gt;3 years</b>                  | 412   | -0.139 (0.022)        | *** | -0.134 (0.022)        | *** | -0.047 (0.023)        | *   | -0.059 (0.023)        | ** | -0.221 (0.022)        | *** | -0.160 (0.023)        | *** | -0.183 (0.023) | *** |
| <b>65 years and older (n=7257)</b>  |       |                       |     |                       |     |                       |     |                       |    |                       |     |                       |     |                |     |
| <b>No delivery</b>                  | 3806  | Ref                   |     | Ref                   |     | Ref                   |     | Ref                   |    | Ref                   |     | Ref                   |     | Ref            |     |
| <b>0_3 months</b>                   | 2090  | 0.006 (0.013)         |     | 0.024 (0.013)         |     | 0.035 (0.012)         | **  | 0.020 (0.012)         |    | 0.001 (0.011)         |     | 0.007 (0.010)         |     | 0.014 (0.010)  |     |
| <b>3_12 months</b>                  | 705   | -0.048 (0.019)        | *   | -0.018 (0.020)        |     | 0.044 (0.018)         | *   | 0.001 (0.018)         |    | -0.096 (0.017)        | *** | -0.019 (0.015)        |     | -0.032 (0.016) | *   |
| <b>1_3 years</b>                    | 504   | 0.035 (0.022)         |     | 0.009 (0.023)         |     | 0.009 (0.021)         |     | -0.024 (0.021)        |    | -0.073 (0.020)        | *** | -0.083 (0.018)        | *** | -0.071 (0.019) | *** |
| <b>&gt;3 years</b>                  | 152   | -0.026 (0.039)        |     | -0.106 (0.041)        | **  | -0.026 (0.036)        |     | -0.066 (0.037)        |    | -0.126 (0.034)        | *** | -0.181 (0.031)        | *** | -0.111 (0.032) | *** |

Each value is the adjusted cognitive z-score difference between two groups.

AC, anticholinergic drug; DSST, Digit Symbol Substitution Test; TMT, A and B, Trail Making Test; SE, standard error

<sup>1</sup>Lifestyle variables: living with a partner, smoking status, alcohol consumption, physical activity, body mass index

<sup>2</sup>Health status variables: self-rated health status, depressive symptoms, diabetes, respiratory diseases, cardiovascular diseases, osteoarticular disease, hypercholesterolemia, and cancer.

P value: \*, 0.01 to 0.05; \*\*, 0.001 to 0.01; \*\*\*, < 0.001

**e-Table 3: Sensitivity analysis of associations linking cumulative anticholinergic drug exposure over the 3 years before cognitive testing and z-scores on cognitive tests, adjusted on lifestyle<sup>a</sup> and health status<sup>b</sup> variables, excluding participants with antipsychotics deliveries (n=33 949)**

| <i>Cumulative AC exposure</i>                                                    |        | <i>Episodic memory</i>       |                            | <i>Verbal fluency</i>   |                         | <i>Executive functions</i> |                         |                       |
|----------------------------------------------------------------------------------|--------|------------------------------|----------------------------|-------------------------|-------------------------|----------------------------|-------------------------|-----------------------|
|                                                                                  |        | <i>Immediate free recall</i> | <i>Delayed free recall</i> | <i>Semantic fluency</i> | <i>Phonemic fluency</i> | <i>DSST</i>                | <i>TMT-A</i>            | <i>TMT-B</i>          |
|                                                                                  |        | Estimate (SE)                | Estimate (SE)              | Estimate (SE)           | Estimate (SE)           | Estimate (SE)              | Estimate (SE)           | Estimate (SE)         |
| <i>Adjusted on lifestyle<sup>a</sup> and health status<sup>b</sup> variables</i> |        |                              |                            |                         |                         |                            |                         |                       |
| <i>None</i>                                                                      | 18 095 | <b>Ref</b>                   | <b>Ref</b>                 | <b>Ref</b>              | <b>Ref</b>              | <b>Ref</b>                 | <b>Ref</b>              | <b>Ref</b>            |
| <i>&lt;3 months</i>                                                              | 10 390 | <b>-0.014</b> (0.012)        | <b>-0.016</b> (0.012)      | <b>-0.021</b> (0.012)   | <b>0.000</b> (0.012)    | <b>-0.002</b> (0.012)      | <b>-0.013</b> (0.012)   | <b>-0.015</b> (0.012) |
| <i>3-12 months</i>                                                               | 3322   | <b>-0.057</b> (0.019) **     | <b>-0.047</b> (0.019) *    | <b>-0.037</b> (0.019)   | <b>-0.005</b> (0.019)   | <b>-0.028</b> (0.019)      | <b>-0.009</b> (0.019)   | <b>-0.026</b> (0.019) |
| <i>1-3 years</i>                                                                 | 1682   | <b>0.019</b> (0.026)         | <b>0.003</b> (0.026)       | <b>-0.023</b> (0.026)   | <b>0.017</b> (0.026)    | <b>-0.020</b> (0.026)      | <b>-0.037</b> (0.026)   | <b>-0.006</b> (0.026) |
| <i>&gt;3 years</i>                                                               | 460    | <b>-0.049</b> (0.048)        | <b>-0.050</b> (0.048)      | <b>0.013</b> (0.048)    | <b>-0.035</b> (0.048)   | <b>-0.104</b> (0.048) *    | <b>-0.097</b> (0.048) * | <b>-0.089</b> (0.048) |

Each value is the adjusted cognitive z-score difference between two groups.

AC, anticholinergic drug; DSST, Digit Symbol Substitution Test; TMT, A and B, Trail Making Test

<sup>a</sup> Lifestyle variables: living with a partner, smoking status, alcohol consumption, physical activity, body mass index

<sup>b</sup> Health status variables: self-rated health status, depressive symptoms, diabetes, respiratory diseases, cardiovascular diseases, osteoarticular disease, hypercholesterolemia, and cancer.

*P* values: 0.05 to 0.10; \*, 0.01 to 0.05; \*\*, 0.001 to 0.01; \*\*\*, < 0.001

**e-Table 4: Associations linking cumulative exposure to anticholinergic drugs over a 3-year period and z-scores on cognitive function tests according to anticholinergic class<sup>1</sup>, adjusted on lifestyle<sup>2</sup> and health status<sup>3</sup> variables (n=30315), “analysis restricted on ACB-1 drugs”.**

| Cumulative AC exposure                       |          |       | Episodic memory           |                           | Verbal fluency           |                          | Executive functions     |                          |                           |
|----------------------------------------------|----------|-------|---------------------------|---------------------------|--------------------------|--------------------------|-------------------------|--------------------------|---------------------------|
|                                              |          |       | Immediate free recall     | Delayed free recall       | Semantic fluency         | Phonemic fluency         | DSST                    | TMT-A                    | TMT-B                     |
|                                              |          |       | Estimate (SE)             | Estimate (SE)             | Estimate (SE)            | Estimate (SE)            | Estimate (SE)           | Estimate (SE)            | Estimate (SE)             |
| <b>Antihistamines</b>                        | None     | 24230 | <b>Ref</b>                | <b>Ref</b>                | <b>Ref</b>               | <b>Ref</b>               | <b>Ref</b>              | <b>Ref</b>               | <b>Ref</b>                |
|                                              | <1 year  | 5670  | <b>0.020</b> (0.007) **   | <b>0.004</b> (0.007)      | <b>-0.010</b> (0.007)    | <b>0.012</b> (0.007)     | <b>0.014</b> (0.007) *  | <b>0.024</b> (0.007) *** | <b>0.031</b> (0.007) ***  |
|                                              | ≥ 1 year | 415   | <b>0.048</b> (0.022) *    | <b>0.050</b> (0.022) *    | <b>-0.038</b> (0.022)    | <b>0.022</b> (0.022)     | <b>0.056</b> (0.022) *  | <b>0.036</b> (0.022)     | <b>0.081</b> (0.022) ***  |
| <b>Opioids</b>                               | None     | 26486 | <b>Ref</b>                | <b>Ref</b>                | <b>Ref</b>               | <b>Ref</b>               | <b>Ref</b>              | <b>Ref</b>               | <b>Ref</b>                |
|                                              | <1 year  | 3793  | <b>-0.038</b> (0.008) *** | <b>-0.041</b> (0.008) *** | <b>-0.002</b> (0.008)    | <b>-0.010</b> (0.008)    | <b>-0.003</b> (0.008)   | <b>-0.002</b> (0.008)    | <b>-0.014</b> (0.008)     |
|                                              | ≥ 1 year | 36    | <b>-0.208</b> (0.074) **  | <b>-0.018</b> (0.074)     | <b>0.076</b> (0.075)     | <b>0.162</b> (0.075) *   | <b>-0.016</b> (0.074)   | <b>0.134</b> (0.074)     | <b>-0.003</b> (0.075)     |
| <b>Alimentary tract and metabolism drugs</b> | None     | 26670 | <b>Ref</b>                | <b>Ref</b>                | <b>Ref</b>               | <b>Ref</b>               | <b>Ref</b>              | <b>Ref</b>               | <b>Ref</b>                |
|                                              | <1 year  | 3594  | <b>0.017</b> (0.008) *    | <b>0.012</b> (0.008)      | <b>-0.003</b> (0.008)    | <b>-0.005</b> (0.008)    | <b>0.009</b> (0.008)    | <b>-0.017</b> (0.008) *  | <b>-0.027</b> (0.008) *** |
|                                              | ≥ 1 year | 51    | <b>0.134</b> (0.063) *    | <b>-0.065</b> (0.062)     | <b>-0.115</b> (0.063)    | <b>-0.133</b> (0.063) *  | <b>-0.146</b> (0.062) * | <b>-0.197</b> (0.063) ** | <b>-0.276</b> (0.063) *** |
| <b>Anxiolytic drugs</b>                      | None     | 28596 | <b>Ref</b>                | <b>Ref</b>                | <b>Ref</b>               | <b>Ref</b>               | <b>Ref</b>              | <b>Ref</b>               | <b>Ref</b>                |
|                                              | <1 year  | 1643  | <b>-0.048</b> (0.012) *** | <b>-0.045</b> (0.012) *** | <b>-0.035</b> (0.012) ** | <b>0.001</b> (0.012)     | <b>-0.004</b> (0.011)   | <b>-0.017</b> (0.012)    | <b>-0.012</b> (0.012)     |
|                                              | ≥ 1 year | 76    | <b>-0.095</b> (0.052)     | <b>-0.157</b> (0.051) **  | <b>0.021</b> (0.052)     | <b>0.019</b> (0.052)     | <b>-0.103</b> (0.051) * | <b>-0.098</b> (0.052)    | <b>-0.119</b> (0.052) *   |
| <b>Antidepressant drugs</b>                  | None     | 29881 | <b>Ref</b>                | <b>Ref</b>                | <b>Ref</b>               | <b>Ref</b>               | <b>Ref</b>              | <b>Ref</b>               | <b>Ref</b>                |
|                                              | <1 year  | 265   | <b>-0.001</b> (0.028)     | <b>0.022</b> (0.028)      | <b>0.052</b> (0.028)     | <b>0.107</b> (0.028) *** | <b>0.069</b> (0.028) *  | <b>0.090</b> (0.028) **  | <b>0.058</b> (0.028) *    |

|                                    |          |       |                           |                           |                           |                           |                           |                           |                           |
|------------------------------------|----------|-------|---------------------------|---------------------------|---------------------------|---------------------------|---------------------------|---------------------------|---------------------------|
|                                    | ≥ 1 year | 169   | <b>0.068</b> (0.035)      | <b>-0.047</b> (0.035)     | <b>0.103</b> (0.035) **   | <b>0.070</b> (0.035) *    | <b>-0.087</b> (0.035) *   | <b>-0.141</b> (0.035) *** | <b>-0.114</b> (0.035) **  |
| <b>Cardiovascular system drugs</b> | None     | 29579 | <b>Ref</b>                |
|                                    | <1 year  | 410   | <b>-0.092</b> (0.022) *** | <b>0.001</b> (0.022)      | <b>-0.020</b> (0.022)     | <b>0.032</b> (0.022)      | <b>-0.046</b> (0.022) *   | <b>-0.090</b> (0.022) *** | <b>-0.075</b> (0.022) *** |
|                                    | ≥ 1 year | 326   | <b>0.076</b> (0.025) **   | <b>0.139</b> (0.025) ***  | <b>0.042</b> (0.025)      | <b>0.001</b> (0.025)      | <b>-0.097</b> (0.025) *** | <b>-0.116</b> (0.025) *** | <b>-0.043</b> (0.025)     |
| <b>Antipsychotics</b>              | None     | 30247 | <b>Ref</b>                |
|                                    | <1 year  | 50    | <b>-0.249</b> (0.063) *** | <b>-0.245</b> (0.063) *** | <b>-0.151</b> (0.064) *   | <b>-0.262</b> (0.064) *** | <b>-0.286</b> (0.063) *** | <b>-0.018</b> (0.063)     | <b>-0.356</b> (0.064) *** |
|                                    | ≥ 1 year | 18    | <b>-0.210</b> (0.105) *   | <b>-0.496</b> (0.105) *** | <b>-0.700</b> (0.106) *** | <b>-0.378</b> (0.106) *** | <b>-0.968</b> (0.105) *** | <b>-0.761</b> (0.105) *** | <b>-0.627</b> (0.106) *** |
| <b>Other AC drugs</b>              | None     | 28235 | <b>Ref</b>                |
|                                    | <1 year  | 1963  | <b>-0.022</b> (0.011) *   | <b>-0.040</b> (0.011) *** | <b>0.008</b> (0.011)      | <b>-0.005</b> (0.011)     | <b>-0.025</b> (0.011) *   | <b>-0.056</b> (0.011) *** | <b>-0.017</b> (0.011)     |
|                                    | ≥ 1 year | 117   | <b>0.040</b> (0.041)      | <b>0.017</b> (0.041)      | <b>-0.055</b> (0.042)     | <b>0.101</b> (0.042) *    | <b>-0.072</b> (0.041)     | <b>-0.078</b> (0.041)     | <b>-0.045</b> (0.042)     |

Values are given as the adjusted difference between two groups in terms of cognitive z-score.

AC, anticholinergic drug; DSST, Digit Symbol Substitution Test; TMT, A and B, Trail Making Test; ATC, Anatomical Therapeutic Chemical classification system; ACB, Anticholinergic Cognitive Burden scale.

<sup>1</sup>Drug classes of anticholinergic agents were determined based on the ATC classification level.

<sup>2</sup>Lifestyle variables: living with a partner, smoking status, alcohol consumption, physical activity, body mass index.

<sup>3</sup>Health status variables: self-rated health status, depressive symptoms, diabetes, respiratory diseases, cardiovascular diseases, osteoarticular disease, hypercholesterolemia, and cancer.

P value: \*, 0.01 to 0.05; \*\*, 0.001 to 0.01; \*\*\*, < 0.001
